# Supplementary material for: Replication of hepatitis E virus in the ovary and promotion of oocyte apoptosis in rabbits infected with HEV-4
Source: PubMed Central journal article supplement (PMC5796988; doi:10.18632/oncotarget.23381), 2017-12-17
Supplement: oncotarget-09-4475-s001.pdf [file oncotarget-09-4475-s001.pdf]

## Replication of hepatitis E virus in the ovary and promotion of oocyte apoptosis in rabbits infected with HEV-4

### SUPPLEMENTARY MATERIALS

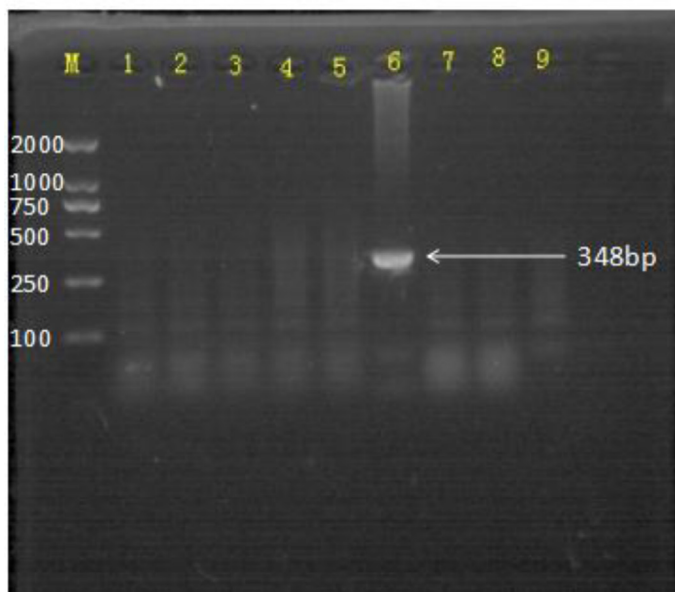

Supplimentary Figure 1: RT-nPCR assays for positive-strand HEV RNA in ovaries at 28 dpi; 1–4:Control group rabbits’ ovaries; 5–8: Experimental group rabbits’ ovaries; 9:negative control; M, marker (From 100 bp to 2000 bp)

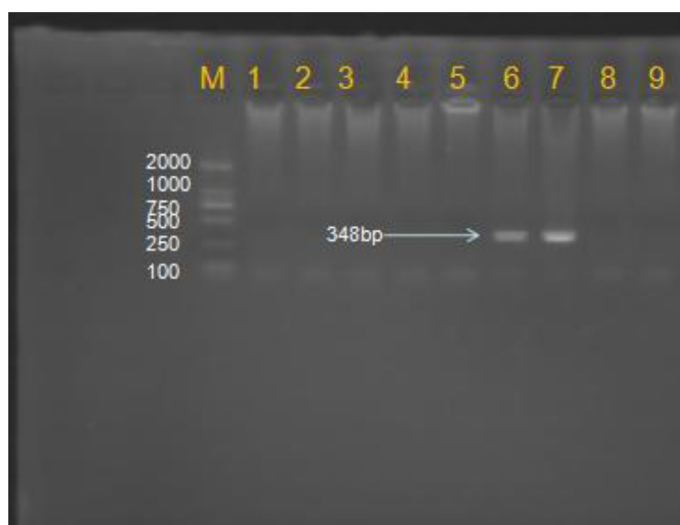

Supplimentary Figure 2: RT-nPCR assays for positive-strand HEV RNA in ovaries at 49 dpi; 1–4:Control group rabbits’ ovaries; 5–8: Experimental group rabbits’ ovaries; 9:negative control; M, marker (From 100 bp to 2000 bp).

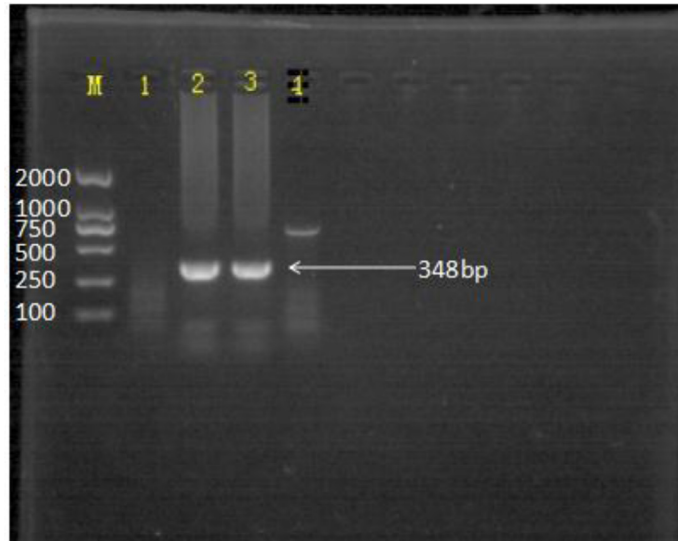

**Supplementary Figure 3: RT-nPCR for negative-strand HEV RNA in ovaries at 28 dpi and 49 dpi.** 1: Positive-strand HEV RNA positive sample at 28 dpi; 2-3: Positive-strand HEV RNA positive samples at 49 dpi; 4: negative control; M, marker (from 100 bp to 2000 bp).

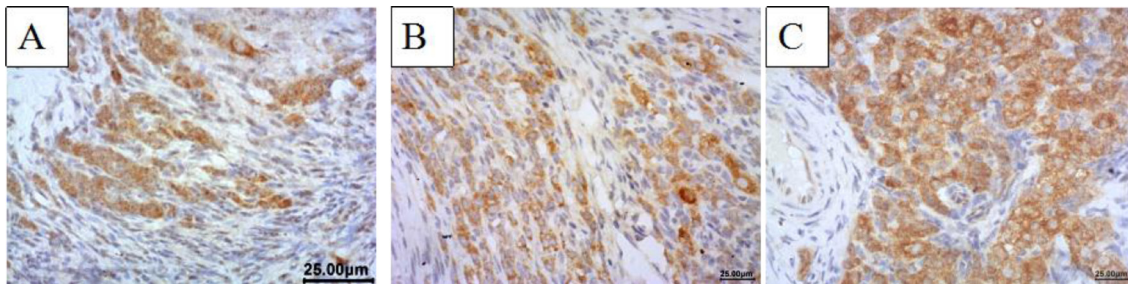

**Supplementary Figure 4: Immunohistochemical stain of ER antigen.** (A) Expression of ER antigen in control group. (B) Expression of ER antigen in HEV RNA positive rabbits at 28 dpi. (C) Expression of ER antigen in HEV RNA positive rabbits at 49 dpi. (Magnification: 40x).

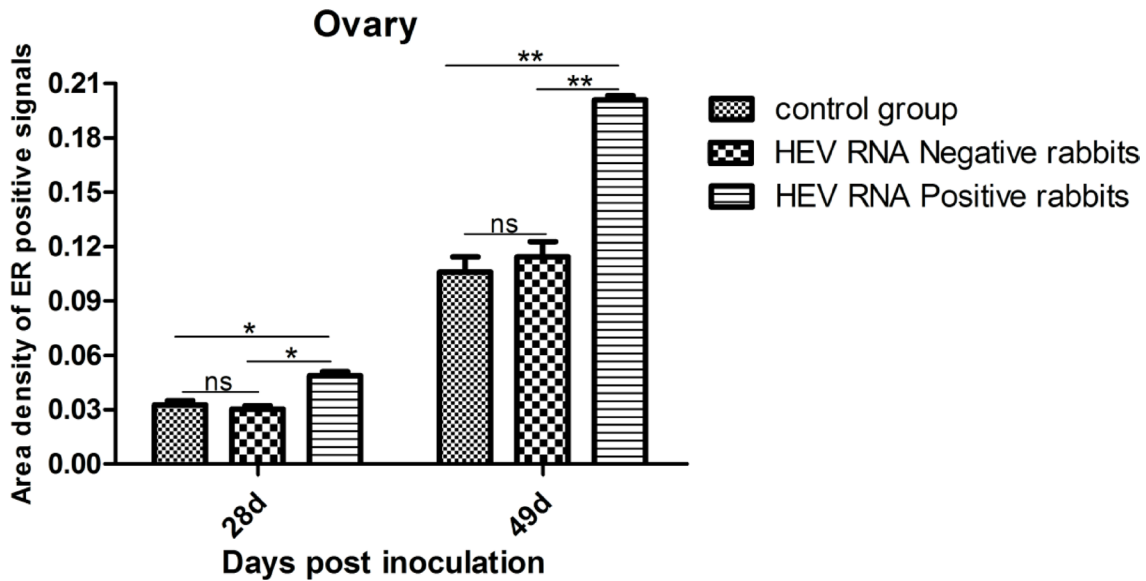

**Supplementary Figure 5: Area density analysis of ER expression in ovaries is indicated in above figure.** Data are shown as mean  $\pm$  SD. \*P significant ( $P$  values < 0.05) and \*\*P significant ( $P$  values < 0.01).

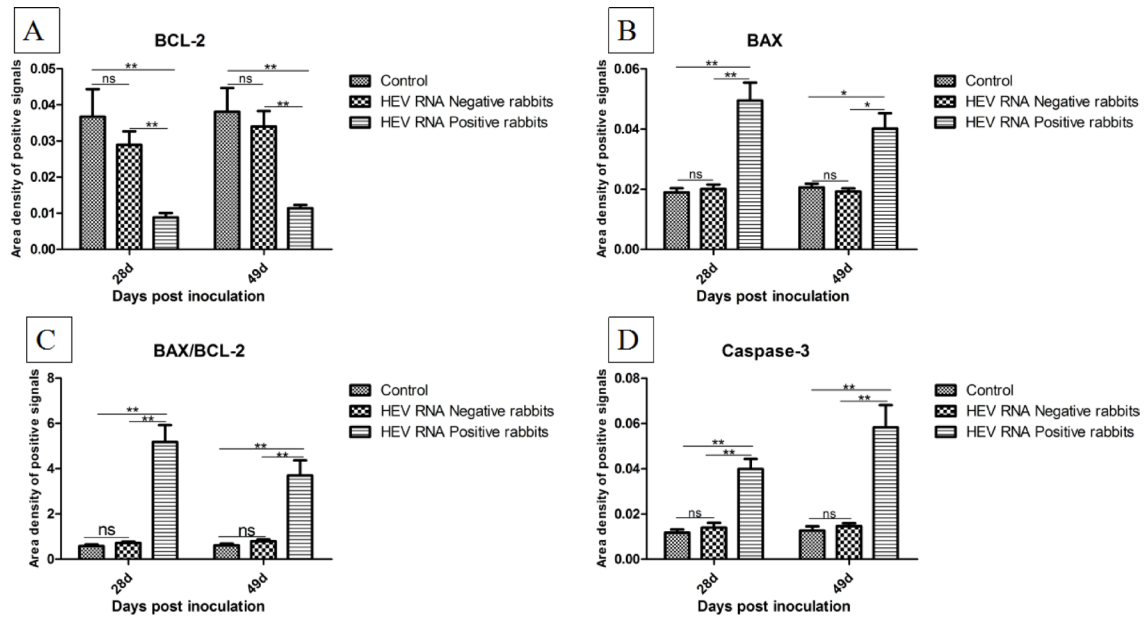

**Supplementary Figure 6:** Area density analysis of apoptotic protein expression levels of BCL-2 (A), BAX (B), BAX/BCL-2 (C), caspase-3 (D) in ovaries is indicated in above figure. Data are shown as mean  $\pm$  SD. \**P* significant (*P* values < 0.05) and \*\**P* significant (*P* values < 0.01).
